# Supplementary material
Source: Elsevier journal article supplement (https://www.sciencedirect.com/science/article/pii/S0210480618302353)
Supplement: mmc1 [file S0210480618302353:mmc1.docx]

**ANEXO I**

**CRITERIOS DE EXCLUSIÓN**

a) evidencia de infección sintomática del tracto urinario (por tira reactiva), inflamación crónica como la cistitis intersticial, litiasis vesical, radioterapia pélvica o enfermedad maligna de los órganos pélvicos, previos o actuales;

b) paciente con alguna causa neurológica que altere la actividad del detrusor (ej, esclerosis múltiple, enfermedad de Parkinson, ictus);

c) prolapso que cause obstrucción, independientemente del grado del mismo;

d) residuo post-miccional significativo (RPM>200ml);

e) pacientes refractarias en tratamiento con toxina botulínica o neuromodulación;

f) paciente que no pueda cumplir con los requisitos establecidos en el protocolo (paciente no colaborador).
